# Supplementary material for: Collagen 1A1 (COL1A1) Is a Reliable Biomarker and Putative Therapeutic Target for Hepatocellular Carcinogenesis and Metastasis
Source: MDPI journal article supplement (doi:10.3390/cancers11060786), 2019-06-07
Supplement: s1 [file s1]

# Supplementary Materials: Collagen 1A1 (COL1A1) Is a Reliable Biomarker and Putative Therapeutic Target for Hepatocellular Carcinogenesis and Metastasis

Hon-Ping Ma, Hang-Lung Chang, Oluwaseun Adebayo Bamodu, Vijesh Kumar Yadav, Ting-Yi Huang, Alexander T. H. Wu, Chi-Tai Yeh, Shin-Han Tsai and Wei-Hwa Lee

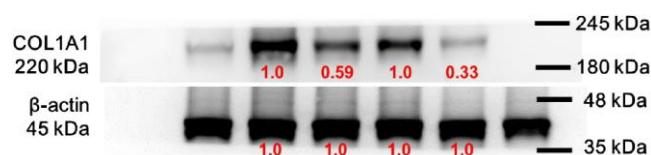

Figure S1. Full-size blots of Figure 3A.

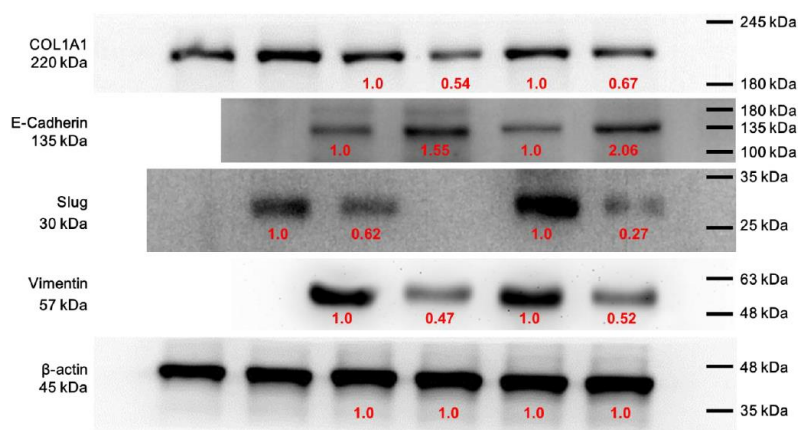

Figure S2. Full-size blots of Figure 3D.

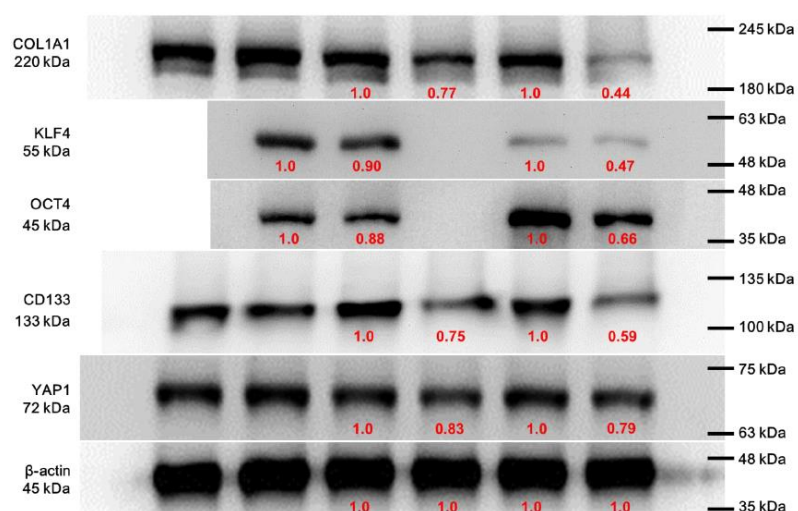

Figure S3. Full-size blots of Figure 5C.

**Table S1.** Western blot antibodies sheet.

| No. | Target         | Dilution | Catalog                                  | kDa |
|-----|----------------|----------|------------------------------------------|-----|
| 1   | COL1A1         | 1:1000   | COL1A1 Antibody #84336                   | 220 |
| 2   | $\beta$ -actin | 1:10,000 | $\beta$ -Actin (8H10D10) Mouse mAb #3700 | 45  |
| 3   | E-Cadherin     | 1:1000   | E-Cadherin (24E10) Rabbit mAb #3195      | 135 |
| 4   | Slug           | 1:1000   | Slug (C19G7) Rabbit mAb #9585            | 30  |
| 5   | Vimentin       | 1:1000   | Anti-Vimentin antibody (ab137321)        | 57  |
| 6   | KLF4           | 1:1000   | Anti-KLF4 antibody (ab129473)            | 55  |
| 7   | OCT4           | 1:1000   | Oct-4 Antibody #2750                     | 45  |
| 8   | CD133          | 1:1000   | Anti-CD133 antibody (ab19898)            | 133 |
| 9   | YAP1           | 1:1000   | Anti-YAP1 antibody (ab56701)             | 72  |

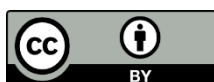

© 2019 by the authors. Licensee MDPI, Basel, Switzerland. This article is an open access article distributed under the terms and conditions of the Creative Commons Attribution (CC BY) license (<http://creativecommons.org/licenses/by/4.0/>).
